# Supplementary material for: Incidence and Predictors of Post-operative Hypoxemia in Pediatric Patients Undergoing General Anesthesia: a Single-arm Prospective Multi-center Cohort Study 2023
Source: Research Square preprint supplement (doi:10.21203/rs.3.rs-3715199/v1), 2024-03-28
Supplement: Supplementary file 1 [file f599a75f7fc303e7b24f9cb1.docx]

**Ethical consideration**

After approval of the proposal, having obtained ethical clearance with Protocol Unique Number duirb/034/23-05, a supportive letter received from the Institutional Review Board (IRB), and approval of the proposal from the Department of Anesthesiology of Dilla University College of Medicine and Health Sciences, a supportive letter was guaranteed from HUCSH, TASH, and St. Peter Specialized Hospital School of Medicine and Health Sciences. The objectives, benefits, harms, voluntariness, and other issues addressed to the study participants, study participants’ parents (forest parents), and written informed consent were obtained.

**Source of funding**

None

**Declaration of competing interest**

The author declare that there is no conflict of interest.

**Acknowledgment**

We express our deepest gratitude to Dilla University College of Medicine and Health Sciences, Department of Anesthesiology, for giving us the opportunity to develop research on the incidence and predictors of POH in pediatric patients who undergo GA.

**Acronyms**

**ARE**………………….….……….…Adverse Respiratory Events

**AOR**…………………….…….…....Adjusted Odd Ratio

**CI**…………………………...…....…Confidence Interval

**COR**…………………………......…Crude Odd Ratio

**ETCO2**…………………...….......…End-tidal Carbon dioxide

**GA**……………………………....…General Anesthesia

**HUCSH**………………………........Hawassa University Comprehensive Specialized Hospital

**OR**…………………………...…….Odd Ratio

**PACU**……………………...………Post Anesthesia Care Unit

**POH**……………………..…..…… Post Operative Hypoxemia

**SPO2** ………………………...……Peripheral Oxygen Saturation

**TASH**………….……….…....……Tikur Anbessa Specialized Hospital

**Consent form**

Hello, my name is -----------. I'm a health professional in this hospital, and we are going to conduct research on the incidence and predictors of postoperative hypoxemia in pediatric patients undergoing GA from May 1, 2023, to July 30, 2023, for the partial fulfillment of a master's degree in anesthesiology. The study is used to provide evidence on the incidence and predictors of postoperative hypoxemia in pediatrics, additionally paving the way to reduce morbidity and mortality due to postoperative hypoxemia. Since you are a parent (foster parent), you have the right to know what will be done while your child participates in research. After the surgery is done and the patient is extubated, data collection will begin. The vital signs of the patient will be recorded, and he or she will be followed during the stay in the post-anesthesia care unit. Even though there are no harms or costs to the patient following data collection, the participation of the patient in the research will have an invaluable contribution to the completion of the research.

Remind yourself that your child's name will not be written and confidentiality will be maintained. You have the right for your child to participate or refuse in the study. As a result, do you want your child to proceed with the research?

A/ Yes ………………    B/ No

If you have any questions or doubts, you can contact the principal investigator at the address below:

Contact address: e-mail: semonpeter123@gmail.com

Phone no.: 0964103528

**Questionnaire**

| MRN (Medical Record Number) -------------------- Date------------  **PART I: Preoperative status of the patient**  1. Age of the patient--------------year 2. Sex--------------------  3. Weight of the patient--------------Kg 4. Height of the patient-------------cm  5. Is there a comorbidity associated with a patient? A/ Yes B/ No If yes, specify  A. Neurologic--------- C. Respiratory (includes upper respiratory tract infection) ------- B. Cardiac----------------- D. Other-------------  6. Pre operative hemoglobin of the patient -----------  7. Diagnosis---------------------- Planned procedure-----------------------------  8. Urgency of surgery A. Elective B. Emergency  9. Preoperative vital signs BP------------ mmHg, HR----------------beat/minute  RR------------ breath/minute, SPO2--------------%, Temperature------------OC  10. Does the patient premedicated before surgery? A/ Yes B/ No If yes, specify  A. Diazepam---------mg (IV/IM/Other--------) B. Other drug--------------mg (IV/IM/Other-----) |
| --- |
| **PART II: Intraoperative status of the patient**  1. Which type of anesthesia given intraoperatively?  A. GA + ETT B. GA + LMA  2. Does the patient induced? A/ Yes B/ No If yes, specify  A. Ketamine----------mg (IV/IM/Other--------) B. Propofol---------mg (IV/IM/Other--------)  C. Ketofol----------mg (IV/IM/Other--------) D. Other drug--------mg (IV/IM/Other--------)  3. Does the patient received muscle relaxant? A/ Yes B/ No If yes, specify  A. Sux. ----------mg (IV/IM/Other--------) B. Vecuro.---------mg (IV/IM/Other--------)  C. Other drug--------mg (IV/IM/Other--------)  4. Which type of ventilation undertaken intraoperatively?  A. Spontaneous B. Assisted C. Controlled  5. How was intraoperative anesthesia maintained with?  A. Inhalational----------------- MAC B. Sux----------mg (IV/IM/Other--------)  C. Vecuronium---------mg (IV/IM/Other--------) D. Other--------mg (IV/IM/Other--------)  6. Analgesic drug was used? A. Yes B. No If yes, specify;  A. Paracetamol-------------mg (IV/IM/Other--------) B. Tramadol --------mg (IV/IM/Other-----)  C. Pethidine--------------mg (IV/IM/Other--------) D. Other-------------mg (IV/IM/Other--------)  7. What type of surgery does the patient undergone?  A. Above abdominal surgeries ------------- B. Other surgeries-------------  8. Where does incision made? A. Upper midline B. Subcostal C. Lower midline  D. Upper and lower midline E. Other-----------  9. How much blood lost during surgery? A. < 50 ml B. 50-150 ml C. 151-250 ml D. > 250 ml  10. In what condition the patient extubated?  A. Awake extubation B. Light plane extubation C. Deep extubation  11. Does reversal used at the end of surgery? A. Yes B. No If yes, specify  A. Neostigmine------------mg (IV/IM/Other--------), Atropine----------mg (IV/IM/Other--------)  B. Other-----------mg (IV/IM/Other--------)  12. How long does anesthesia takes? A. ≤ 60 minutes B. > 1 hour  13. How long does surgery takes? A. ≤ 60 minutes B. > 1 hour  14. What was intraoperative status of the patient? A. Stable B. Other---------------------  I. Length of patient stay in operation room after end of procedure and transfer to recovery ------------minutes |

**PART III: Postoperative status of the patient**

| Parameters | Time in minutes (local time with D = day and N = night) | | | | | | | | | | | | | | | | |
| --- | --- | --- | --- | --- | --- | --- | --- | --- | --- | --- | --- | --- | --- | --- | --- | --- | --- |
| 0 | 5 | 10 | 15 | 20 | 30 | 40 | 50 | 60 | 70 | 80 | 90 | 100 | 110 | 120 | 130 | 140 |
| BP |  |  |  |  |  |  |  |  |  |  |  |  |  |  |  |  |  |
| HR |  |  |  |  |  |  |  |  |  |  |  |  |  |  |  |  |  |
| RR |  |  |  |  |  |  |  |  |  |  |  |  |  |  |  |  |  |
| SPO2 |  |  |  |  |  |  |  |  |  |  |  |  |  |  |  |  |  |
| Temperature |  |  |  |  |  |  |  |  |  |  |  |  |  |  |  |  |  |
| Drugs used |  |  |  |  |  |  |  |  |  |  |  |  |  |  |  |  |  |
|  | | | | | | | | | | | | | | | | | |

| Parameters | Time in minutes (local time with D = day and N = night) | | | | | | | | | | | | | | | |
| --- | --- | --- | --- | --- | --- | --- | --- | --- | --- | --- | --- | --- | --- | --- | --- | --- |
| 150 | 160 | 170 | 180 | 190 | 200 | 210 | 220 | 230 | 240 | 250 | 260 | 270 | 280 | 290 | 300 |
| BP |  |  |  |  |  |  |  |  |  |  |  |  |  |  |  |  |
| HR |  |  |  |  |  |  |  |  |  |  |  |  |  |  |  |  |
| RR |  |  |  |  |  |  |  |  |  |  |  |  |  |  |  |  |
| SPO2 |  |  |  |  |  |  |  |  |  |  |  |  |  |  |  |  |
| Temperature |  |  |  |  |  |  |  |  |  |  |  |  |  |  |  |  |
| Drugs used |  |  |  |  |  |  |  |  |  |  |  |  |  |  |  |  |
| II. Length of patient stay in operation theatre ------------minutes  III. Where does the patient transferred?  A. Transferred to ward C. Transferred to ICU  B. Transferred to operation theatre D. Other-------------------------- | | | | | | | | | | | | | | | | |
